1  
2  
3  
4  
5  
6  
7  
8  
9  
10  
11  
12  
13  
14  
15  
16  
17  
18  
19  
20  
21  
22  
23  
24  
25  
26  
27  
28  
29  
30  
31  
32

TECHNICAL NOTE

A standardized broad host range inverter package for genetic  
circuitry design in Gram-negative bacteria

by

Huseyin Tas<sup>1</sup>, Ángel Goñi-Moreno<sup>2,3</sup> and Víctor de Lorenzo<sup>1\*</sup>

*Systems Biology Department, Centro Nacional de Biotecnología-CSIC, Campus de Cantoblanco, Madrid 28049, Spain, <sup>2</sup>School of Computing, Newcastle University, Newcastle Upon Tyne, NE4 5TG, UK, <sup>3</sup>Centro de Biotecnología y Genómica de Plantas (CBGP, UPM-INIA), Universidad Politécnica de Madrid (UPM), Instituto Nacional de Investigación y Tecnología Agraria y Alimentaria (INIA), Campus de Montegancedo-UPM, 28223 Pozuelo de Alarcón, Madrid, Spain*

**Running Title:** Assets for gene circuit design in non-*E. coli* bacteria

---

\* Correspondence to: Víctor de Lorenzo  
Centro Nacional de Biotecnología-CSIC  
Campus de Cantoblanco, Madrid 28049, Spain  
Tel.: 34- 91 585 45 36; Fax: 34- 91 585 45 06  
E-mail: [vdlorenzo@cnb.csic.es](mailto:vdlorenzo@cnb.csic.es)

---

**Abbreviations:** BHR, broad host range; SD, Shine-Dalgarno sequence; RBS, ribosomal binding sequence; IPTG, isopropyl thiogalactopyranoside; CAD, computer-assisted design; SEVA, Standard European Vector Architecture.

1 **ABSTRACT**

2

3 Genetically encoded logic gates, especially inverters—NOT gates—are the building blocks for designing  
4 circuits, engineering biosensors or decision-making devices in synthetic biology. However, the repertoire  
5 of inverters readily available for different species is rather limited. In this work, a large whole of NOT  
6 gates that was shown to function previously in a specific strain of *Escherichia coli*, was recreated as  
7 broad host range (BHR) collection of constructs assembled in low, medium and high copy number  
8 plasmid backbones of the SEVA (Standard European Vector Architecture) collection. The input/output  
9 function of each of the gates was characterized and parameterized in the environmental bacterium and  
10 metabolic engineering chassis *Pseudomonas putida*. Comparisons of the resulting fluorescence  
11 cytometry data with those published for the same gates in *Escherichia coli* provided useful hints on the  
12 portability of the corresponding gates. The hereby described BHR inverter package (20 different  
13 versions of 12 distinct gates) thus becomes a toolbox of choice for designing genetic circuitries in a  
14 variety of Gram-negative species other than *E. coli*.

15

16 **KEYWORDS:** *Broad host range tools, inverter library, gates, Pseudomonas putida, flow cytometry,*  
17 *biosensor, automated circuit design*

18

19

20 Design and implementation of genetic circuits is one of trademarks of contemporary synthetic biology<sup>1</sup>.  
21 The archetypal approach involves abstracting biological cues (e.g. effectors, metabolites, proteins) and  
22 physicochemical signals (e.g. inducers, temperature) as inputs. These are processed through a more or  
23 less complex computation layer (most often assembled with regulatory parts: transcriptional factors,  
24 riboregulators etc.) which then releases another biological signal as the output. This in turn can be used  
25 as the input for another node of the circuit and so on<sup>2, 3</sup>. Further abstraction of biological circuits as  
26 wholes of Boolean logic gates enables a superior level of complexity, as shown by a suite of examples  
27 involving rewiring of stress responses, detection of environmental contaminants, implementation of  
28 cellular calculators and others<sup>4-7</sup>. Yet, as the demand for increasingly complex circuits grows<sup>5, 8, 9</sup>, so  
29 does the interest in automation of their design and execution. One major landmark in this direction was  
30 the publication in 2016 of the CelloCAD platform<sup>5</sup>, a complete operative system for virtual assembly and  
31 eventual implementation of logic circuits in *E. coli* through combination of series of NOR gates—based  
32 themselves on a large collection of well characterized promoter/repressor pairs (i.e. inverters or NOT

1 gates). This tool affords automated design and simulation in seconds of complex genetic networks with  
 2 successful prediction of > 70% of all states shown by the actual DNA constructs once synthesized and  
 3 knocked in *E. coli*<sup>5, 7</sup>. Yet, due to the material nature of the building blocks, CAD tools such as Cello are  
 4 inherently restrictive to single strains or species. While these systems may work well in a given  
 5 organism, the parameters and general behavior can change very significantly when passed to other  
 6 hosts. This is a considerable issue when circuits are desired to compute signals under environmental  
 7 and industrial conditions for which *E. coli* is not an optimal chassis.

8

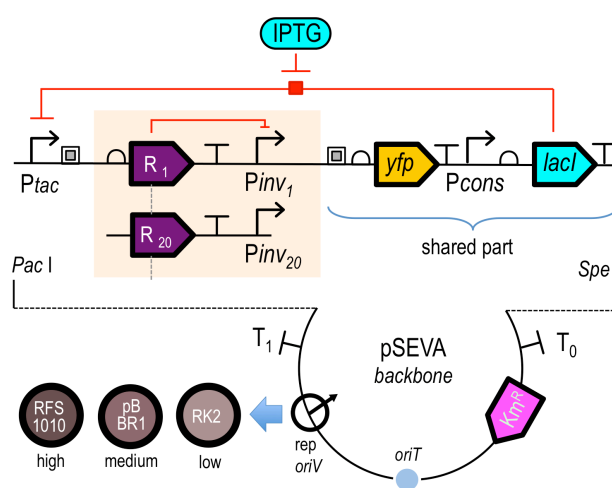

9

10

11 **Figure 1.** Schematic representation of BHR genetically-encoded inverters. The organization of the functional  
 12 parts borne by the 20 variants assembled following the SEVA standard is sketched (components not to scale).  
 13 Similarly to the earlier collection for *E. coli*<sup>5</sup> there are segments shared by all construct i.e. the *Ptac/lacI*//IPTG-  
 14 dependent expression system for each of the repressor/SD combinations ( $R_1$  to  $R_{20}$ ) and the *yfp* gene used for  
 15 fluorescent readout of inverter performance (the *lacI* gene is expressed through the same constitutive promoter  
 16  $P_{cons}$ ). The Km resistance gene and the DNA sequences that punctuate the SEVA backbone ( $T_1$  and  $T_0$   
 17 terminators, origin of conjugal transfer *oriT*) are common to all constructs as well. The variable parts include [i] the  
 18 DNA encoding the SD, the repressor gene (R) and the cognate repressible promoter (*Pinv*) upstream of the  
 19 reporter *yfp* and [ii] the BHR origin of replication: RK2, pBBR1 or RSF1010, each of them supporting different  
 20 plasmid copy numbers as indicated.

21

22 On this basis we set out to engineer a robust and easy-to-use package of standardized NOT gates that  
 23 could be used for circuit design in Gram-negative bacteria other than *E. coli* and that—once  
 24 characterized in the host of interest—could benefit from the CelloCAD software<sup>5</sup> for automatic assembly  
 25 of the cognate DNA.

26

27 To this end, we recreated the DNA sequence encoding each of the inverters available in the Cello  
 28 platform and pass them to vectors of the broad host range SEVA (Standard European Vector  
 29 Architecture) collection with low, medium and high copy numbers. The general organization of the

1 constructs is sketched in Fig. 1. Note that the business part of each plasmid is flanked by upstream and  
 2 downstream terminators added by the SEVA structure to mitigate potential readthrough from vector  
 3 promoters. The plasmids backbones were retrieved from the SEVA database and repository<sup>10</sup>.

4

5 In practical terms, each of the segments encoding the gates was amplified from the collection of *E. coli*  
 6 NEB10 $\beta$  strains bearing p15A/Km<sup>R</sup> vectors (~15 copies) inserted with the cognate DNA<sup>5</sup>. Primers  
 7 (Merck Sigma Aldrich, Inc) were designed for adding SEVA-compatible PacI and SpeI restriction sites to  
 8 the extremes of the amplicons generated with the Q5 High-Fidelity DNA polymerase (New England  
 9 BioLabs, Inc.). The oligonucleotides used for amplification of the DNA of the NOT gates and verification  
 10 of the constructs are listed in Supplementary Table S2. Following PCR, the resulting fragments were  
 11 separately cloned in pSEVA221 (RK2*oriV*,  $\leq$  5 copies/cell), pSEVA231 (BBR1*oriV*, ~ 30 copies) and  
 12 pSEVA251 (RFS1010*oriV*,  $\geq$  50 copies) and first captured, verified and resequenced in the host strain  
 13 *P. putida* KT2440. The complete catalogue of constructs is listed in Table 1.

14

15 **Table 1.** Library of available genetically-encoded  
 16 inverters and auxiliary plasmids in SEVA vectors  
 17 with 3 different copy numbers (see Supplementary  
 18 Table S1 for plasmid names and cargoes). Note  
 19 that 5 inverters caused growth inhibition when  
 20 cloned in high copy number vectors, plausibly due  
 21 to toxicity of the repressor protein encoded therein.  
 22 The repressor borne by each of the gates is  
 23 described in<sup>5</sup>.

24

25 Note that some gates (those designated  
 26 BM3R1-B1, PhIF-P3, QacR-Q2, SrpR-S2  
 27 and SrpR-S3) could not be cloned in the  
 28 higher copy number vectors, presumably

| Inverters         | Low Copy Number | Medium Copy Number | High Copy Number |
|-------------------|-----------------|--------------------|------------------|
| AmeR-F1           | ✓               | ✓                  | ✓                |
| AmtR-A1           | ✓               | ✓                  | ✓                |
| BetI-E1           | ✓               | ✓                  | ✓                |
| BM3R1-B1          | ✓               | ✓                  | -                |
| BM3R1-B2          | ✓               | ✓                  | ✓                |
| BM3R1-B3          | ✓               | ✓                  | ✓                |
| HlyIIR-H1         | ✓               | ✓                  | ✓                |
| IcaRA-I1          | ✓               | ✓                  | ✓                |
| LitR-L1           | ✓               | ✓                  | ✓                |
| LmrA-N1           | ✓               | ✓                  | ✓                |
| PhIF-P1           | ✓               | ✓                  | ✓                |
| PhIF-P2           | ✓               | ✓                  | ✓                |
| PhIF-P3           | ✓               | ✓                  | -                |
| PsrA-R1           | ✓               | ✓                  | ✓                |
| QacR-Q1           | ✓               | ✓                  | ✓                |
| QacR-Q2           | ✓               | ✓                  | -                |
| SrpR-S1           | ✓               | ✓                  | ✓                |
| SrpR-S2           | ✓               | ✓                  | -                |
| SrpR-S3           | ✓               | ✓                  | -                |
| SrpR-S4           | ✓               | ✓                  | ✓                |
| Auto-fluorescence | ✓               | ✓                  | ✓                |
| Standardization   | ✓               | ✓                  | ✓                |
| Promoter Activity | ✓               | ✓                  | ✓                |

29 due to the toxicity effects of the encoded repressor proteins. The collection (Table 1 and Supplementary  
 30 Table S1) includes a total of 12 inverters, some of them bearing two or more variants of the Shine-  
 31 Dalgarno sequence of the repressor gene that changes its expression levels. For example, AmeR-F1  
 32 (AmeR is the gate and F1 is the SD) has only 1 version of the ribosomal binding site of the repressor  
 33 gene; however, SrpR has 4 versions (SrpR-S1, SrpR-S2, SrpR-S3, SrpR-S4 (SrpR is the gate and S1,  
 34 S2, S3 and S4 the 4 different SDs)). Note also that the arrangement of functional parts of the gates in  
 35 the SEVA vectors is identical to the one originally adopted in the p15A/Km<sup>R</sup> vectors of the Cello platform  
 36 (Fig. 1). In addition to the plasmids bearing 20 inverters, we built a set of reference constructs allowing

1 relative promoter units (RPU) to be converted and compared between different conditions (see below).  
2 These references (Supplementary Fig. S1) include [i] autofluorescence plasmids (recreating the  
3 business parts of pAN1201<sup>5</sup> and consisting of each of the backbone plasmids but without any insert e.g.  
4 missing the repressor/target promoter segments highlighted in Fig. 1, [ii] RPU standard plasmids  
5 derived from pAN1717<sup>5</sup> in which *yfp* is expressed through the constitutive promoter J23101 and which  
6 are used in combination with the autofluorescence plasmid for converting YFP readouts of each inverter  
7 into RPU (see equation #1 below) and [iii] promoter activity plasmid recreating pAN1818<sup>5</sup>, which is used  
8 for measuring the promoter activity (pTac-YFP) based on inducer concentrations (Supplementary Fig.  
9 S1).

10  
11

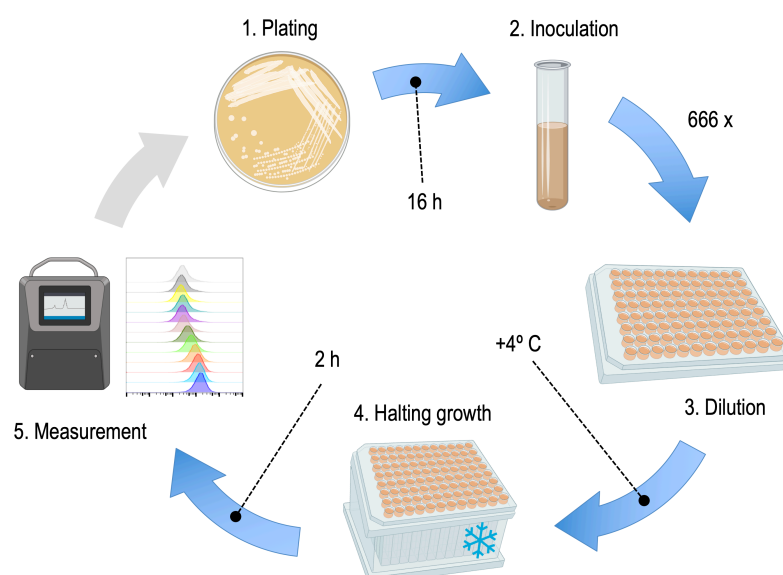

12  
13  
14

15 **Figure 2.** Experimental protocol used for measuring performance of the genetic inverters listed in Table 1 in *P.*  
16 *putida* KT2440. In all experiments bacteria were grown in M9 medium adapted for growth of *P. putida*. 250 ml of  
17 liquid culture contained 25 ml x10 M9 salts, 500  $\mu$ l of 1M MgSO<sub>4</sub>, 2.2 ml of 20% citrate and milliQ-H<sub>2</sub>O to volume.  
18 50  $\mu$ g ml<sup>-1</sup> kanamycin was also added to secure plasmid retention (all them Km<sup>R</sup>). For the experiments, a  
19 saturated overnight culture of each of the strains under were diluted over ~ 600-fold in the wells of a microtiter  
20 plate with 200  $\mu$ l per well, plated for 24h, added with IPTG concentrations ranging 0 to 1000  $\mu$ M and incubated at  
21 30 °C with shaking for 24 h. Cultures (typically reaching OD<sub>600</sub> ~ 0.2-0.3) were then kept in the cold for the rest of  
22 the procedure. YFP fluorescence distribution of each sample was measured with a Miltenyi Biotec MACS flow  
23 cytometer at channel B1 with an excitation of 488 nm and emission of 525/50 nm. For each sample 30 thousand  
24 events were collected with singlet gating. Calibration was done by using MACSQuant Calibration Beads (see text  
25 for explanation).

26

27 The library of constructs listed in Table 1 and Supplementary Table S1 is expected to ease utilization of  
28 CelloCAD as a genetic programming tool in a suite of Gram-negative bacteria. Note that users have a

1 choice to pick the same gate borne by plasmids with different copy numbers, what may be critical to  
2 avoid potential toxicity. Adoption of the standard SEVA format gives two additional advantages. While  
3 the construct library of Supplementary Table S1 was built on vectors with a Km resistance gene, the  
4 modularity of the SEVA format makes its replacement by an alternative antibiotic marker for selection<sup>10</sup>,  
5 <sup>11</sup> easy. Also, the BHR nature of the standardized constructs affords their implantation in diverse Gram-  
6 negative hosts, thereby giving a chance to compare their performance in different species and thus  
7 learn about interoperability and context dependencies in circuit designs.

8  
9 In order to validate these features we tested and parameterized the whole low-copy number versions of  
10 the inverter library of Supplementary Table S1 in the environmental bacterium and Synthetic Biology  
11 chassis *Pseudomonas putida* KT2440<sup>12, 13</sup>. The experimental workflow to this end (Fig. 2) was designed  
12 considering the specific needs of *P. putida* for growth as detailed in the legend of the figure. Once  
13 strains bearing each of the constructs were generated, transformants were grown and IPTG  
14 concentrations of (5-1000 μM) added to activate each of the devices, for a total 24 h period. YFP  
15 fluorescence emission detected with a flow cytometer was recorded after 24 of IPTG addition. Data  
16 were then analyzed with FlowJo software (<https://www.flowjo.com/>). An important detail was that the  
17 auto-gating option of the software was set considering at least 50% of the events covered while Forward  
18 and Side scatters were plotted. The same gating conditions were applied to all specimens in the same  
19 group and repeated for all the samples.

20  
21 On the basis of the thereby produced data we quantified the output of the individual devices at each  
22 condition as standard RPU (relative promoter units). This was done by characterizing the fluorescence  
23 values emitted by the bacterial population of the cultures exposed to IPTG levels covering an induction  
24 ranges from none to saturation (in our case 12 points of growing effector concentrations). On this basis,  
25 the RPU value at each point can be calculated with the formula (1):

26

$$27 \quad RPU = \frac{\langle YFP \rangle - \langle YFP \rangle_{\text{autofluorescence}}}{\langle YFP \rangle_{\text{standardization}} - \langle YFP \rangle_{\text{autofluorescence}}}$$

28

29 Where  $\langle YPF \rangle$  is the median fluorescence value from the gate of interest that is to be converted into  
30 RPU (from either the inverter-bearing plasmids or the control promoter activity plasmid),  
31  $\langle YPF \rangle_{\text{autofluorescence}}$  is the median fluorescence value of auto-fluorescence plasmid,  $\langle YPF \rangle_{\text{standardization}}$  is  
32 the median fluorescence value from the standardization plasmid. Next, the output vs input values of

1 each inverter were represented in a response function plot generated with Hill fits and utilizing the RPU  
 2 figures as the input to the calculations. Specifically, Hill equation parameters were estimated by plotting  
 3 each inducer levels with their corresponding standardized median fluorescence values (Supplementary  
 4 Data S2) by means of the equation (2):

5

$$6 \quad y = y_{min} + \frac{(y_{max} - y_{min}) k^n}{k^n + x^n}$$

7

8 where  $y$  is the output promoter activity,  $y_{min}$  is the minimum observed value for promoter activity,  $y_{max}$  is  
 9 the maximum observed value for promoter activity,  $k$  is the input value for which half maximum value for  
 10 output promoter is reached,  $n$  is the Hill coefficient. Experimental response data were thus entered in  
 11 the above Hill equation. The corresponding Hill parameters are provided in Supplementary Table S3 for  
 12 both *E. coli* (retrieved from [www.cellocad.org](http://www.cellocad.org)) and *P. putida* values (this study). Fitting was performed  
 13 with MATLAB using the scripts provided in Supplementary Data S1.

14

15

16

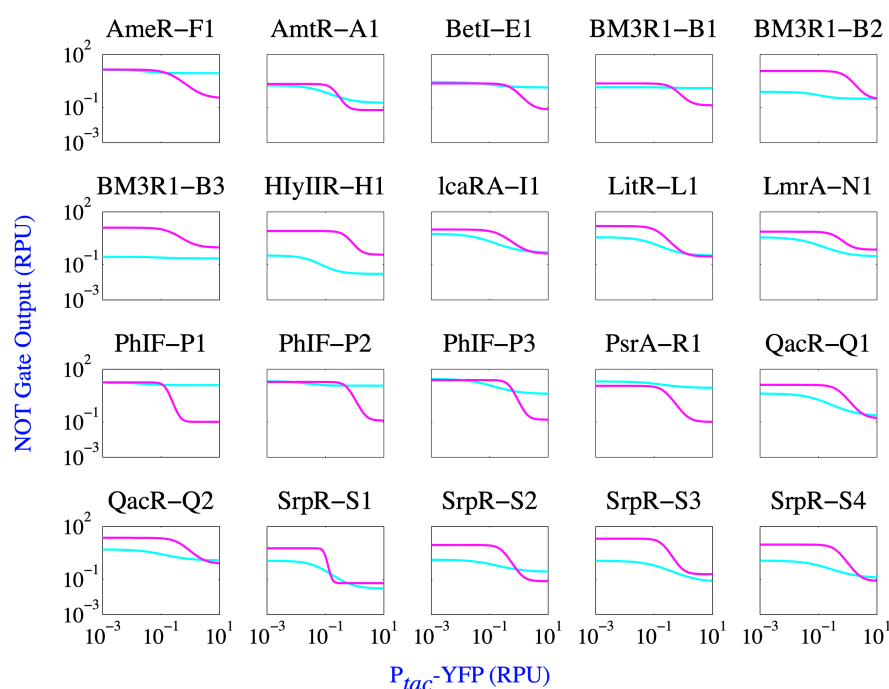

17

18

19

20 **Figure 3.** Behavior of genetically-encoded inverters in *P. putida* vs. *E. coli*. The panel shows the comparisons of  
 21 the of the Hill of the same inverters in *E. coli* NEB10 $\beta$  (magenta; data retrieved from<sup>5</sup>) and behavior the same  
 22 devices in *P. putida* KT2440 (cyan; experimental from this study). X-axes correspond to the activity of the IPTG-  
 23 inducible pTac promoter and Y-axes indicate the activity of corresponding inverters. Both axes indicate YFP  
 24 expression in RPUs.

25



1 The resulting characterization of the 20 inverters (listed in the Supplementary Table S1) in *P. putida*  
2 based on the protocols and calculations above is shown in Fig. 3. The data showed a range of  
3 divergences in the behavior of the inverters in either host. In some cases, the patterns were comparable  
4 both in terms of the dynamic ranges of the input/output, the contour of the response curves and the  
5 specific values of promoter strengths. In other cases, the shape of the curve was kept but the  
6 boundaries changed very significantly. And finally, in yet another series of devices there was little if any  
7 similarity in their input/output transfer functions between the two types of bacteria. While these data  
8 expose the limitations of just exporting genetic devices from one species to the other, the large  
9 repertoire of gates also enable users to pick the ones whose parameters are compatible with the  
10 CelloCAD tool for automation of circuit designs<sup>5</sup>. Furthermore, the dataset associated to Fig. 3 encrypts  
11 valuable, quantitative information on the interoperability of parts and circuits between different biological  
12 recipients of the same constructs, an issue hardly tackled thus far in the Synthetic Biology literature<sup>14, 15,</sup>  
13 <sup>16</sup>

14  
15 In sum, we believe that the hereby described collection of inverters available in a BHR format will help to  
16 expand the possibilities of genetic programming towards bacteria other than *E. coli* but still interesting  
17 from a SynBio-inspired biotechnological perspective. Furthermore, their testing and parameterization in  
18 various hosts may deliver general portability rules that thus far rely on a mere trial-and-error exercise.  
19 The whole collection of constructs is available through the SEVA database and vector repository at  
20 <http://seva.cnb.csic.es> .

21  
22 Associated content

23  
24 **Supporting information**

25  
26 

---

Supplementary Figure S1

27  
28 

---

Supplementary Table S1: BHR Inverters (XLSX)

29 

---

Supplementary Table S2: Primers (XLSX)

30 

---

Supplementary Table S3: Insulated gate response functions (XLSX)

31  
32 

---

Supplementary Data S1: Scripts (MATLAB)

33 

---

Supplementary Data S2: Median Values (XLSX)

34



1  
2  
3  
4  
5  
6  
7  
8  
9  
10  
11  
12  
13  
14  
15  
16  
17  
18  
19  
20  
21  
22  
23  
24  
25  
26  
27  
28  
29  
30  
31

**Acknowledgements.** We are indebted to Chris Voigt and Alec Nielsen (MIT) for sharing the collection of NOT gates developed for the Cello platform.

**Author Contributions.** HT, AG-M and VdL planned the experiments, analyzed and discussed the data and contributed to the writing of the article.

**Funding.** This work was funded by the SETH Project of the Spanish Ministry of Science RTI 2018-095584-B-C42, the MADONNA (H2020-FET-OPEN-RIA-2017-1-766975), BioRoboost (H2020-NMBP-BIO-CSA-2018), SYN BIO4FLAV (H2020-NMBP/0500) and MIX-UP (H2020-Grant 870294) Contracts of the European Union, the S2017/BMD-3691 InGEMICS-CM Project of the Comunidad de Madrid (European Structural and Investment Funds) and the SynBio3D project of the UK Engineering and Physical Sciences Research Council (EP/R019002/1).

**Notes.** The authors declare no competing financial interest

## REFERENCES

- [1] Slusarczyk, A. L., Lin, A., and Weiss, R. (2012) Foundations for the design and implementation of synthetic genetic circuits, *Nature Reviews Genetics* 13, 406-420.
- [2] Kumar, J., Narnoliya, L. K., and Alok, A. (2019) A CRISPR Technology and Biomolecule Production by Synthetic Biology Approach, In *Current Developments in Biotechnology and Bioengineering*, pp 143-161.
- [3] Xin, F., Dong, W., Dai, Z., Jiang, Y., Yan, W., Lv, Z., Fang, Y., and Jiang, M. (2019) Biosynthetic Technology and Bioprocess Engineering, In *Current Developments in Biotechnology and Bioengineering*, pp 207-232.
- [4] Miyamoto, T., Razavi, S., DeRose, R., and Inoue, T. (2013) Synthesizing biomolecule-based Boolean logic gates, *ACS Synth Biol* 2, 72-82.
- [5] Nielsen, A. A., Der, B. S., Shin, J., Vaidyanathan, P., Paralanov, V., Strychalski, E. A., Ross, D., Densmore, D., and Voigt, C. A. (2016) Genetic circuit design automation, *Science* 352, aac7341.

- 1 [6] Stanton, B. C., Nielsen, A. A., Tamsir, A., Clancy, K., Peterson, T., and Voigt, C. A. (2014)  
2 Genomic mining of prokaryotic repressors for orthogonal logic gates, *Nat Chem Biol* 10, 99-105.
- 3 [7] Shin, J., Zhang, S., Der, B. S., Nielsen, A. A., and Voigt, C. A. (2020) Programming *Escherichia*  
4 *coli* to function as a digital display, *Molecular Systems Biology* 16.
- 5 [8] Mohammadi, P., Beerenwinkel, N., and Benenson, Y. (2017) Automated Design of Synthetic Cell  
6 Classifier Circuits Using a Two-Step Optimization Strategy, *Cell Syst* 4, 207-218 e214.
- 7 [9] Xiang, Y., Dalchau, N., and Wang, B. (2018) Scaling up genetic circuit design for cellular  
8 computing: advances and prospects, *Nat Comput* 17, 833-853.
- 9 [10] Martinez-Garcia, E., Goni-Moreno, A., Bartley, B., McLaughlin, J., Sanchez-Sampedro, L., Pascual  
10 Del Pozo, H., Prieto Hernandez, C., Marletta, A. S., De Lucrezia, D., Sanchez-Fernandez, G.,  
11 Fraile, S., and de Lorenzo, V. (2020) SEVA 3.0: an update of the Standard European Vector  
12 Architecture for enabling portability of genetic constructs among diverse bacterial hosts, *Nucleic*  
13 *Acids Res* 48, D1164-D1170.
- 14 [11] Martinez-Garcia, E., Aparicio, T., Goni-Moreno, A., Fraile, S., and de Lorenzo, V. (2015) SEVA 2.0:  
15 an update of the Standard European Vector Architecture for de-/re-construction of bacterial  
16 functionalities, *Nucleic Acids Res* 43, D1183-1189.
- 17 [12] Nikel, P. I., Martínez-García, E., and de Lorenzo, V. (2014) Biotechnological domestication of  
18 pseudomonads using synthetic biology, *Nat Rev Microbiol* 12, 368-379.
- 19 [13] Martínez-García, E., and de Lorenzo, V. (2019) *Pseudomonas putida* in the quest of programmable  
20 chemistry, *Curr Opin Biotechnol* 59, 111-121.
- 21 [14] Beal, J., Haddock-Angelli, T., Gershater, M., De Mora, K., Lizarazo, M., Hollenhorst, J., Rettberg,  
22 R., and Contributors, i. I. S. (2016) Reproducibility of fluorescent expression from engineered  
23 biological constructs in *E. coli*, *PloS one* 11, e0150182.
- 24 [15] Khan, N., Yeung, E., Farris, Y., Fansler, S. J., and Bernstein, H. C. (2020) A broad-host-range  
25 event detector: expanding and quantifying performance between *Escherichia coli* and  
26 *Pseudomonas* species, *Synthetic Biology* 5, ysaa002.
- 27 [16] Boo, A., Ellis, T., and Stan, G.-B. (2019) Host-aware synthetic biology, *Curr Op Syst Biol* 14, 66-72.
- 28
